# Supplementary material for: Provision of Mental Health Services in the Veterans Health Administration: A Nationwide Comparison With Other Providers
Source: Atypon-hosted journal article supplement (doi:10.1176/appi.ps.202100713), 2022-10-27
Supplement: appi.ps.20210713.ds001.pdf [file appi.ps.20210713.ds001.pdf]

Provision of Specialized Mental Health Services in the Veterans Health Administration Supplement

Supplemental Table. Comparing Number of Total Services Between VHA vs. Non-VHA Adult Only Facilities in a Mixed-Effects Linear Regression<sup>a,b</sup>

| Variable                                                    | Estimate | SE   | p      |
|-------------------------------------------------------------|----------|------|--------|
| Is a VHA Facility                                           | 8.57     | 0.43 | <0.001 |
| >250 treatment initiations in the past year <sup>c</sup>    | 0.86     | 0.29 | 0.002  |
| Offers 24-hour Hospital Inpatient Mental Health Treatment   | 3.98     | 0.33 | <0.001 |
| Offers Outpatient and Partial Hospitalization/Day Treatment | 3.82     | 0.31 | <0.001 |
| Offers 24-hour Residential Mental Health Treatment          | 2.18     | 0.33 | <0.001 |

<sup>a</sup>Source: National Mental Health Services Survey, 2018.

<sup>b</sup>The mixed effects linear regression model used the facility's state location as the random intercept. The marginal pseudo R<sup>2</sup> was 0.20.

<sup>c</sup>For inpatient facilities, this variable refers to the number of patient admissions in the past year. For outpatient facilities, this variable refers to the number of initiations of a course of treatment in the past year.

Supplemental Table. Comparing Number of Total Services Between VHA vs. Non-VHA All Ages Facilities in a Mixed-Effects Linear Regression<sup>a,b</sup>

| Variable                                                    | Estimate | SE   | p      |
|-------------------------------------------------------------|----------|------|--------|
| Is a VHA Facility                                           | 6.86     | 0.40 | <0.001 |
| >250 treatment initiations in the past year <sup>c</sup>    | 2.39     | 0.19 | <0.001 |
| Offers 24-hour Hospital Inpatient Mental Health Treatment   | 1.59     | 0.33 | <0.001 |
| Offers Outpatient and Partial Hospitalization/Day Treatment | 0.81     | 0.31 | <0.001 |
| Offers 24-hour Residential Mental Health Treatment          | 3.76     | 0.38 | <0.001 |

<sup>a</sup>Source: National Mental Health Services Survey, 2018.

<sup>b</sup>The mixed effects linear regression model used the facility's state location as the random intercept. The marginal pseudo R<sup>2</sup> was 0.13.

<sup>c</sup>For inpatient facilities, this variable refers to the number of patient admissions in the past year. For outpatient facilities, this variable refers to the number of initiations of a course of treatment in the past year.

Supplemental Table. Comparing Number of Treatment Modalities Between VHA vs. Non-VHA Adult Only Facilities in a Mixed-Effects Linear Regression<sup>a,b</sup>

| Variable                                                    | Estimate | SE   | p      |
|-------------------------------------------------------------|----------|------|--------|
| Is a VHA Facility                                           | 1.71     | 0.16 | <0.001 |
| >250 treatment initiations in the past year <sup>c</sup>    | 0.40     | 0.11 | <0.001 |
| Offers 24-hour Hospital Inpatient Mental Health Treatment   | 1.46     | 0.12 | <0.001 |
| Offers Outpatient and Partial Hospitalization/Day Treatment | 1.24     | 0.11 | <0.001 |
| Offers 24-hour Residential Mental Health Treatment          | 0.16     | 0.12 | 0.19   |

<sup>a</sup>Source: National Mental Health Services Survey, 2018.

<sup>b</sup>The mixed effects linear regression model used the facility's state location as the random intercept. The marginal pseudo R<sup>2</sup> was 0.14.

<sup>c</sup>For inpatient facilities, this variable refers to the number of patient admissions in the past year. For outpatient facilities, this variable refers to the number of initiations of a course of treatment in the past year.

Supplemental Table. Comparing Number of Treatment Modalities Between VHA vs. Non-VHA All Ages Facilities in a Mixed-Effects Linear Regression<sup>a,b</sup>

| Variable                                                    | Estimate | SE   | p      |
|-------------------------------------------------------------|----------|------|--------|
| Is a VHA Facility                                           | 0.57     | 0.12 | <0.001 |
| >250 treatment initiations in the past year <sup>c</sup>    | 0.75     | 0.06 | <0.001 |
| Offers 24-hour Hospital Inpatient Mental Health Treatment   | 0.45     | 0.10 | <0.001 |
| Offers Outpatient and Partial Hospitalization/Day Treatment | 0.36     | 0.09 | <0.001 |
| Offers 24-hour Residential Mental Health Treatment          | 0.91     | 0.11 | <0.001 |

<sup>a</sup>Source: National Mental Health Services Survey, 2018.

<sup>b</sup>The mixed effects linear regression model used the facility's state location as the random intercept. The marginal pseudo R<sup>2</sup> was 0.07.

<sup>c</sup>For inpatient facilities, this variable refers to the number of patient admissions in the past year. For outpatient facilities, this variable refers to the number of initiations of a course of treatment in the past year.

Supplemental Table. Comparing Number of Specialized Services Between VHA vs. Non-VHA Adult Only Facilities in a Mixed-Effects Linear Regression<sup>a,b</sup>

| Variable                                                    | Estimate | SE   | p      |
|-------------------------------------------------------------|----------|------|--------|
| Is a VHA Facility                                           | 4.38     | 0.23 | <0.001 |
| >250 treatment initiations in the past year <sup>c</sup>    | 0.50     | 0.16 | 0.001  |
| Offers 24-hour Hospital Inpatient Mental Health Treatment   | 1.61     | 0.18 | <0.001 |
| Offers Outpatient and Partial Hospitalization/Day Treatment | 1.76     | 0.17 | <0.001 |
| Offers 24-hour Residential Mental Health Treatment          | 1.59     | 0.18 | <0.001 |

<sup>a</sup>Source: National Mental Health Services Survey, 2018.

<sup>b</sup>The mixed effects linear regression model used the facility's state location as the random intercept. The marginal pseudo R<sup>2</sup> was 0.16.

<sup>c</sup>For inpatient facilities, this variable refers to the number of patient admissions in the past year. For outpatient facilities, this variable refers to the number of initiations of a course of treatment in the past year.

Supplemental Table. Comparing Number of Specialized Services Between VHA vs. Non-VHA All Ages Facilities in a Mixed-Effects Linear Regression<sup>a,b</sup>

| Variable                                                    | Estimate | Std. Error | p      |
|-------------------------------------------------------------|----------|------------|--------|
| Is a VHA Facility                                           | 4.55     | 0.22       | <0.001 |
| >250 treatment initiations in the past year <sup>c</sup>    | 1.18     | 0.10       | <0.001 |
| Offers 24-hour Hospital Inpatient Mental Health Treatment   | 0.85     | 0.18       | <0.001 |
| Offers Outpatient and Partial Hospitalization/Day Treatment | 0.74     | 0.17       | <0.001 |
| Offers 24-hour Residential Mental Health Treatment          | 1.72     | 0.21       | <0.001 |

<sup>a</sup>Source: National Mental Health Services Survey, 2018.

<sup>b</sup>The mixed effects linear regression model used the facility's state location as the random intercept. The marginal pseudo R<sup>2</sup> was 0.14.

<sup>c</sup>For inpatient facilities, this variable refers to the number of patient admissions in the past year. For outpatient facilities, this variable refers to the number of initiations of a course of treatment in the past year.

Supplemental Table. Comparing Number of Group Treatments Between VHA vs. Non-VHA Adult Only Facilities in a Mixed-Effects Linear Regression<sup>a,b</sup>

| Variable                                                    | Estimate | SE   | p      |
|-------------------------------------------------------------|----------|------|--------|
| Is a VHA Facility                                           | 2.46     | 0.18 | <0.001 |
| >250 treatment initiations in the past year <sup>c</sup>    | -0.02    | 0.12 | 0.893  |
| Offers 24-hour Hospital Inpatient Mental Health Treatment   | 0.91     | 0.14 | <0.001 |
| Offers Outpatient and Partial Hospitalization/Day Treatment | 0.84     | 0.13 | <0.001 |
| Offers 24-hour Residential Mental Health Treatment          | 0.41     | 0.14 | 0.003  |

<sup>a</sup>Source: National Mental Health Services Survey, 2018.

<sup>b</sup>The mixed effects linear regression model used the facility's state location as the random intercept. The marginal pseudo R<sup>2</sup> was 0.09.

<sup>c</sup>For inpatient facilities, this variable refers to the number of patient admissions in the past year. For outpatient facilities, this variable refers to the number of initiations of a course of treatment in the past year.

Supplemental Table. Comparing Number of Group Treatments Between VHA vs. Non-VHA All Ages Facilities in a Mixed-Effects Linear Regression<sup>a,b</sup>

| Variable                                                    | Estimate | SE   | p      |
|-------------------------------------------------------------|----------|------|--------|
| Is a VHA Facility                                           | 1.74     | 0.21 | <0.001 |
| >250 treatment initiations in the past year <sup>c</sup>    | 0.45     | 0.10 | <0.001 |
| Offers 24-hour Hospital Inpatient Mental Health Treatment   | 0.29     | 0.17 | 0.087  |
| Offers Outpatient and Partial Hospitalization/Day Treatment | -0.30    | 0.16 | 0.058  |
| Offers 24-hour Residential Mental Health Treatment          | 1.12     | 0.19 | <0.001 |

<sup>a</sup>Source: National Mental Health Services Survey, 2018.

<sup>b</sup>The mixed effects linear regression model used the facility's state location as the random intercept. The marginal pseudo R<sup>2</sup> was 0.03.

<sup>c</sup>For inpatient facilities, this variable refers to the number of patient admissions in the past year. For outpatient facilities, this variable refers to the number of initiations of a course of treatment in the past year.
